# Supplementary material for: Acute Effects of Smoked and Vaporized Cannabis in Healthy Adults Who Infrequently Use Cannabis: A Crossover Trial
Source: PubMed Central journal article supplement (PMC6324384; doi:10.1001/jamanetworkopen.2018.4841), 2018-11-30
Supplement: jamanetwopen-1-e184841-s002.pdf [file jamanetwopen-1-e184841-s002.pdf]

## Supplementary Online Content

Spindle TR, Cone EJ, Schlienz NJ, et al. Acute effects of smoked and vaporized cannabis in healthy adults who infrequently use cannabis: a crossover trial. *JAMA Netw Open*. 2018;1(7):e184841. doi:10.1001/jamanetworkopen.2018.4841

**eFigure.** Mean Whole Blood  $\Delta$ 9-Tetrahydrocannabinol (THC) Concentration Over Time, Across Dose for (A) Smoked and (B) vaporized Conditions

**eTable.** Correlations (Pearson  $r$ ) Between Individual Change From Baseline Values for Whole Blood  $\Delta$ 9-tetrahydrocannabinol (THC) Levels and Pharmacodynamic Measures

This supplementary material has been provided by the authors to give readers additional information about their work.

**eFigure.** Mean Whole Blood  $\Delta$ 9-Tetrahydrocannabinol (THC) Concentration Over Time, Across Dose for (A) Smoked and (B) Vaporized Conditions

### Whole Blood THC

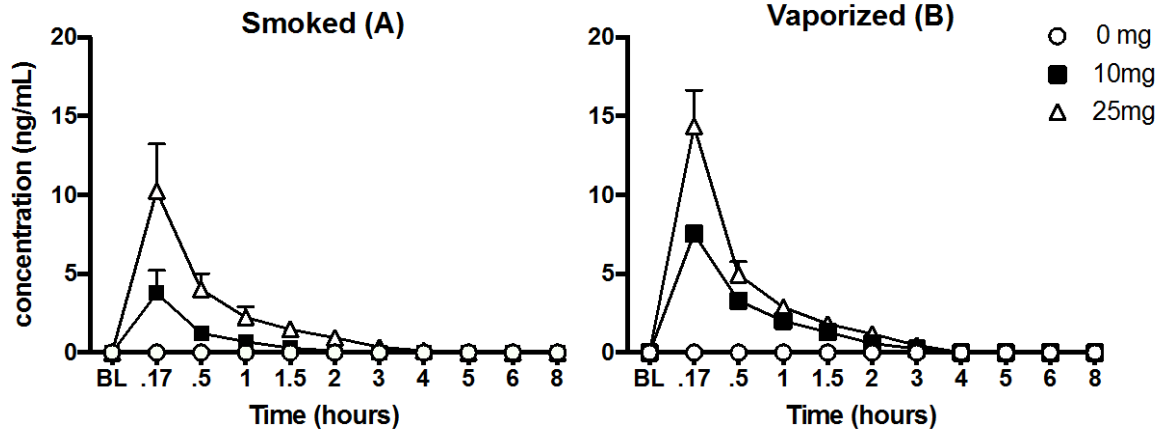

Horizontal axes are not accurate time scales and represent the time points at which blood was sampled. BL=baseline time point; ng/mL=nanograms/milliliter; mg=milligrams.

eTable. Correlations (Pearson  $r$ ) Between Individual Change From Baseline Values for Whole Blood  $\Delta$ 9-tetrahydrocannabinol (THC) Levels and Pharmacodynamic Measures

|                              | Whole Blood THC Concentration |           |
|------------------------------|-------------------------------|-----------|
|                              | Smoked                        | Vaporized |
| <b>10mg THC dose</b>         |                               |           |
| Drug Effect (DEQ)            | 0.38*                         | 0.54*     |
| Heart Rate                   | 0.25*                         | 0.40*     |
| DSST (Total Correct)         | -0.06                         | -0.23     |
| DAT (Distance from stimulus) | 0.08                          | 0.05      |
| DAT (Total Correct)          | 0.07                          | 0.01      |
| PASAT (Total Correct)        | 0.11                          | -0.07     |
| <b>25mg THC dose</b>         |                               |           |
| Drug Effect (DEQ)            | 0.51*                         | 0.52*     |
| Heart Rate                   | 0.37*                         | 0.37*     |
| DSST (Total Correct)         | -0.18                         | -0.32*    |
| DAT (Distance from stimulus) | 0.01                          | 0.14      |
| DAT (Total Correct)          | -0.05                         | -0.14     |
| PASAT (Total Correct)        | -0.07                         | -0.19     |

Note. Asterisks (\*) denote statistical significance (all  $ps < .05$ ). DEQ=Drug Effect Questionnaire; DSST=Digit Symbol Substitution Task; PASAT=Paced Serial Auditory Addition Task”; mg=milligram. A Holm-Bonferroni correction was applied to  $p$  values for these analyses to reduce the chance of committing a type 1 error.
