# Supplementary material for: Acute Effects of Smoked and Vaporized Cannabis in Healthy Adults Who Infrequently Use Cannabis: A Crossover Trial
Source: PubMed Central journal article supplement (PMC6324384; doi:10.1001/jamanetworkopen.2018.4841), 2018-11-30
Supplement: jamanetwopen-1-e184841-s003.pdf [file jamanetwopen-1-e184841-s003.pdf]

## **Data Sharing Statement**

Spindle. Acute Effects of Smoked and Vaporized Cannabis in Healthy Adults Who Infrequently Use Cannabis. *JAMA Netw Open*. Published November 30, 2018. 10.1001/jamanetworkopen.2018.4841

### **Data**

**Data available:** No
